# Supplementary material for: Anhydrous cadmium oxalate polymorphism: a first principle study
Source: Royal Society of Chemistry journal article supplement (doi:10.1039/c9ce01232j), 2019-01-01
Supplement: c9ce01232j4.pdf [file c9ce01232j4.pdf]

## Supplementary Information: Anhydrous cadmium oxalate polymorphism: a first principle study

Raffaella Demichelis

*Curtin Institute for Computation, The Institute for Geoscience Research (TIGeR) and School of Molecular and Life Science, GPO Box U1987, 6845 Perth, Western Australia, Australia*

This file contains IR and Raman active modes and intensities for the three phases, and fractional coordinates of  $\text{CdC}_2\text{O}_4 \cdot 3 \text{H}_2\text{O}$ . Oscillator strengths are reported in separate files.

|    | $\nu_{IR}$ | Sym   | $I_{IR}$ | $\nu_{Raman}$ | Sym   | $I_p$   | $I_{pl}$ | $I_{pp}$ | $I_{xx}$ | $I_{xy}$ | $I_{xz}$ | $I_{yy}$ | $I_{yz}$ | $I_{zz}$ |
|----|------------|-------|----------|---------------|-------|---------|----------|----------|----------|----------|----------|----------|----------|----------|
| 1  | 78.8       | $A_u$ | 2.94     | 86.1          | $A_g$ | 285.27  | 168.79   | 116.48   | 27.08    | 0.00     | 69.65    | 260.26   | 0.00     | 17.95    |
| 2  | 90.6       | $B_u$ | 27.58    | 184.7         | $B_g$ | 161.98  | 92.56    | 69.42    | 0.00     | 123.81   | 0.00     | 0.00     | 4.23     | 0.00     |
| 3  | 97.0       | $A_u$ | 5.28     | 189.3         | $A_g$ | 449.34  | 324.36   | 124.98   | 388.63   | 0.00     | 39.84    | 112.18   | 0.00     | 55.09    |
| 4  | 113.5      | $B_u$ | 3.13     | 199.8         | $B_g$ | 135.78  | 77.59    | 58.19    | 0.00     | 56.79    | 0.00     | 0.00     | 50.54    | 0.00     |
| 5  | 123.9      | $A_u$ | 15.12    | 232.0         | $B_g$ | 258.40  | 147.66   | 110.74   | 0.00     | 52.02    | 0.00     | 0.00     | 152.23   | 0.00     |
| 6  | 163.6      | $B_u$ | 6.75     | 234.3         | $A_g$ | 324.65  | 222.55   | 102.10   | 31.21    | 0.00     | 9.32     | 4.31     | 0.00     | 418.09   |
| 7  | 172.3      | $A_u$ | 0.09     | 504.8         | $A_g$ | 652.59  | 612.46   | 40.13    | 209.92   | 0.00     | 32.47    | 430.09   | 0.00     | 61.63    |
| 8  | 197.5      | $A_u$ | 11.16    | 539.2         | $B_g$ | 73.15   | 41.80    | 31.35    | 0.00     | 24.40    | 0.00     | 0.00     | 33.43    | 0.00     |
| 9  | 205.5      | $B_u$ | 16.84    | 592.1         | $A_g$ | 84.44   | 62.26    | 22.18    | 7.95     | 0.00     | 3.34     | 14.52    | 0.00     | 88.85    |
| 10 | 267.8      | $B_u$ | 82.36    | 599.4         | $B_g$ | 51.68   | 29.53    | 22.15    | 0.00     | 4.49     | 0.00     | 0.00     | 36.37    | 0.00     |
| 11 | 279.2      | $A_u$ | 2.78     | 833.4         | $A_g$ | 112.41  | 64.61    | 47.79    | 24.67    | 0.00     | 22.50    | 97.46    | 0.00     | 10.16    |
| 12 | 433.5      | $A_u$ | 1.71     | 836.6         | $B_g$ | 11.37   | 6.50     | 4.87     | 0.00     | 0.76     | 0.00     | 0.00     | 8.23     | 0.00     |
| 13 | 437.1      | $B_u$ | 11.71    | 904.3         | $B_g$ | 76.75   | 43.86    | 32.89    | 0.00     | 55.88    | 0.00     | 0.00     | 4.79     | 0.00     |
| 14 | 517.0      | $B_u$ | 49.51    | 906.9         | $A_g$ | 133.09  | 128.09   | 5.01     | 57.45    | 0.00     | 2.60     | 75.80    | 0.00     | 14.37    |
| 15 | 524.7      | $A_u$ | 26.48    | 1461.6        | $B_g$ | 130.39  | 74.51    | 55.88    | 0.00     | 66.97    | 0.00     | 0.00     | 36.10    | 0.00     |
| 16 | 794.7      | $A_u$ | 40.16    | 1472.3        | $A_g$ | 1000.00 | 852.43   | 147.57   | 103.69   | 0.00     | 71.37    | 23.53    | 0.00     | 1000.00  |
| 17 | 796.6      | $B_u$ | 26.95    | 1599.0        | $A_g$ | 79.86   | 62.19    | 17.67    | 0.65     | 0.00     | 6.73     | 0.76     | 0.00     | 93.06    |
| 18 | 1328.1     | $A_u$ | 100.04   | 1615.9        | $B_g$ | 12.98   | 7.41     | 5.56     | 0.00     | 9.37     | 0.00     | 0.00     | 0.88     | 0.00     |
| 19 | 1333.3     | $B_u$ | 83.50    |               |       |         |          |          |          |          |          |          |          |          |
| 20 | 1588.1     | $B_u$ | 1000.00  |               |       |         |          |          |          |          |          |          |          |          |
| 21 | 1605.8     | $A_u$ | 0.07     |               |       |         |          |          |          |          |          |          |          |          |

Table 1: Computed IR and Raman active wavenumbers ( $\nu$ , in  $\text{cm}^{-1}$ ) for  $\beta\text{-CdC}_2\text{O}_4$ . Intensities ( $I$ , in arbitrary units) have been normalised, with the highest intensity assuming a value of 1000.00. For Raman spectra, the parallel ( $I_{pl}$ ) and perpendicular ( $I_{pp}$ ) components to the polycrystalline isotropic intensities ( $I_p$ ) and the single crystal directional intensities ( $I_{xx}$ ,  $I_{xy}$ ,  $I_{xz}$ ,  $I_{yy}$ ,  $I_{yz}$ ,  $I_{zz}$ ) are reported. Raman spectra are calculated assuming an incident laser wavelength of 532 nm and a temperature of 300 K.

Email address: [raffaella.demichelis@curtin.edu.au](mailto:raffaella.demichelis@curtin.edu.au) (Raffaella Demichelis)

|    | $\nu_{IR}$ | Sym      | $I_{IR}$ | $\nu_{Raman}$ | Sym      | $I_p$   | $I_{pl}$ | $I_{pp}$ | $I_{xx}$ | $I_{xy}$ | $I_{xz}$ | $I_{yy}$ | $I_{yz}$ | $I_{zz}$ |
|----|------------|----------|----------|---------------|----------|---------|----------|----------|----------|----------|----------|----------|----------|----------|
| 1  | 51.7       | $B_{1u}$ | 0.12     | 40.6          | $B_{1g}$ | 197.72  | 112.99   | 84.74    | 0.00     | 132.60   | 0.00     | 0.00     | 0.00     | 0.00     |
| 2  | 68.6       | $B_{3u}$ | 0.29     | 57.1          | $B_{1g}$ | 77.93   | 44.53    | 33.40    | 0.00     | 52.27    | 0.00     | 0.00     | 0.00     | 0.00     |
| 3  | 88.3       | $B_{1u}$ | 0.30     | 78.1          | $B_{3g}$ | 0.12    | 0.07     | 0.05     | 0.00     | 0.00     | 0.08     | 0.00     | 0.00     | 0.00     |
| 4  | 93.4       | $B_{2u}$ | 23.60    | 88.0          | $B_{3g}$ | 47.70   | 27.26    | 20.44    | 0.00     | 0.00     | 31.99    | 0.00     | 0.00     | 0.00     |
| 5  | 123.2      | $B_{3u}$ | 22.05    | 106.1         | $B_{1g}$ | 2.66    | 1.52     | 1.14     | 0.00     | 1.78     | 0.00     | 0.00     | 0.00     | 0.00     |
| 6  | 132.9      | $B_{2u}$ | 27.78    | 109.6         | $A_g$    | 25.59   | 22.28    | 3.31     | 0.04     | 0.00     | 0.00     | 4.64     | 0.00     | 22.45    |
| 7  | 139.6      | $B_{2u}$ | 15.17    | 110.7         | $B_{2g}$ | 270.25  | 154.43   | 115.82   | 0.00     | 0.00     | 0.00     | 0.00     | 181.24   | 0.00     |
| 8  | 162.0      | $B_{1u}$ | 5.11     | 131.1         | $B_{3g}$ | 472.07  | 269.75   | 202.31   | 0.00     | 0.00     | 316.59   | 0.00     | 0.00     | 0.00     |
| 9  | 173.8      | $B_{3u}$ | 0.02     | 152.5         | $B_{2g}$ | 268.48  | 153.42   | 115.06   | 0.00     | 0.00     | 0.00     | 0.00     | 180.05   | 0.00     |
| 10 | 200.0      | $B_{2u}$ | 11.54    | 154.2         | $A_g$    | 149.23  | 87.66    | 61.57    | 93.34    | 0.00     | 0.00     | 19.16    | 0.00     | 85.42    |
| 11 | 210.1      | $B_{1u}$ | 123.71   | 179.7         | $A_g$    | 233.35  | 141.11   | 92.24    | 28.88    | 0.00     | 0.00     | 159.18   | 0.00     | 117.63   |
| 12 | 251.5      | $B_{1u}$ | 2.57     | 184.4         | $B_{2g}$ | 158.52  | 90.59    | 67.94    | 0.00     | 0.00     | 0.00     | 0.00     | 106.31   | 0.00     |
| 13 | 251.8      | $B_{3u}$ | 98.70    | 194.7         | $B_{1g}$ | 509.16  | 290.95   | 218.21   | 0.00     | 341.47   | 0.00     | 0.00     | 0.00     | 0.00     |
| 14 | 273.0      | $B_{3u}$ | 0.85     | 206.5         | $B_{3g}$ | 88.78   | 50.73    | 38.05    | 0.00     | 0.00     | 59.54    | 0.00     | 0.00     | 0.00     |
| 15 | 418.7      | $B_{1u}$ | 11.53    | 222.3         | $A_g$    | 306.73  | 182.40   | 124.33   | 1.48     | 0.00     | 0.00     | 91.90    | 0.00     | 311.35   |
| 16 | 423.3      | $B_{3u}$ | 0.00     | 222.8         | $B_{2g}$ | 17.28   | 9.88     | 7.41     | 0.00     | 0.00     | 0.00     | 0.00     | 11.59    | 0.00     |
| 17 | 442.8      | $B_{3u}$ | 0.48     | 237.7         | $B_{1g}$ | 0.40    | 0.23     | 0.17     | 0.00     | 0.27     | 0.00     | 0.00     | 0.00     | 0.00     |
| 18 | 456.6      | $B_{1u}$ | 0.30     | 248.3         | $B_{3g}$ | 395.32  | 225.89   | 169.42   | 0.00     | 0.00     | 265.12   | 0.00     | 0.00     | 0.00     |
| 19 | 502.5      | $B_{2u}$ | 32.82    | 508.6         | $A_g$    | 425.19  | 419.28   | 5.91     | 92.87    | 0.00     | 0.00     | 91.11    | 0.00     | 220.78   |
| 20 | 517.1      | $B_{1u}$ | 4.21     | 510.2         | $B_{2g}$ | 29.80   | 17.03    | 12.77    | 0.00     | 0.00     | 0.00     | 0.00     | 19.99    | 0.00     |
| 21 | 517.3      | $B_{3u}$ | 34.87    | 522.4         | $A_g$    | 330.45  | 226.42   | 104.03   | 397.25   | 0.00     | 0.00     | 1.33     | 0.00     | 9.37     |
| 22 | 786.2      | $B_{1u}$ | 37.44    | 533.5         | $B_{2g}$ | 0.01    | 0.00     | 0.00     | 0.00     | 0.00     | 0.00     | 0.00     | 0.01     | 0.00     |
| 23 | 789.3      | $B_{2u}$ | 52.69    | 594.0         | $B_{1g}$ | 6.49    | 3.71     | 2.78     | 0.00     | 4.36     | 0.00     | 0.00     | 0.00     | 0.00     |
| 24 | 791.6      | $B_{3u}$ | 9.61     | 616.4         | $B_{3g}$ | 98.33   | 56.19    | 42.14    | 0.00     | 0.00     | 65.94    | 0.00     | 0.00     | 0.00     |
| 25 | 1333.4     | $B_{2u}$ | 174.21   | 618.2         | $B_{2g}$ | 29.54   | 16.88    | 12.66    | 0.00     | 0.00     | 0.00     | 0.00     | 19.81    | 0.00     |
| 26 | 1338.9     | $B_{1u}$ | 61.46    | 618.6         | $A_g$    | 71.44   | 54.75    | 16.69    | 4.16     | 0.00     | 0.00     | 1.56     | 0.00     | 77.03    |
| 27 | 1340.5     | $B_{3u}$ | 125.75   | 846.1         | $B_{1g}$ | 3.20    | 1.83     | 1.37     | 0.00     | 2.15     | 0.00     | 0.00     | 0.00     | 0.00     |
| 28 | 1599.9     | $B_{1u}$ | 1000.00  | 846.8         | $B_{3g}$ | 8.16    | 4.66     | 3.50     | 0.00     | 0.00     | 5.47     | 0.00     | 0.00     | 0.00     |
| 29 | 1627.2     | $B_{3u}$ | 806.20   | 851.7         | $B_{1g}$ | 22.25   | 12.71    | 9.53     | 0.00     | 14.92    | 0.00     | 0.00     | 0.00     | 0.00     |
| 30 | 1628.2     | $B_{1u}$ | 148.17   | 852.4         | $B_{3g}$ | 0.16    | 0.09     | 0.07     | 0.00     | 0.00     | 0.11     | 0.00     | 0.00     | 0.00     |
| 31 | 1693.9     | $B_{3u}$ | 57.70    | 901.5         | $B_{2g}$ | 7.18    | 4.11     | 3.08     | 0.00     | 0.00     | 0.00     | 0.00     | 4.82     | 0.00     |
| 32 |            |          |          | 905.6         | $B_{2g}$ | 23.32   | 13.33    | 9.99     | 0.00     | 0.00     | 0.00     | 0.00     | 15.64    | 0.00     |
| 33 |            |          |          | 906.3         | $A_g$    | 86.95   | 63.60    | 23.36    | 9.94     | 0.00     | 0.00     | 78.98    | 0.00     | 14.65    |
| 34 |            |          |          | 910.5         | $A_g$    | 210.97  | 187.59   | 23.37    | 175.61   | 0.00     | 0.00     | 1.39     | 0.00     | 43.02    |
| 35 |            |          |          | 1463.5        | $B_{2g}$ | 444.91  | 254.24   | 190.68   | 0.00     | 0.00     | 0.00     | 0.00     | 298.38   | 0.00     |
| 36 |            |          |          | 1463.8        | $A_g$    | 286.67  | 200.58   | 86.09    | 27.85    | 0.00     | 0.00     | 280.26   | 0.00     | 41.89    |
| 37 |            |          |          | 1466.0        | $B_{2g}$ | 7.15    | 4.09     | 3.07     | 0.00     | 0.00     | 0.00     | 0.00     | 4.80     | 0.00     |
| 38 |            |          |          | 1468.4        | $A_g$    | 1000.00 | 805.94   | 194.06   | 8.77     | 0.00     | 0.00     | 112.33   | 0.00     | 1000.00  |
| 39 |            |          |          | 1605.4        | $B_{1g}$ | 8.95    | 5.11     | 3.84     | 0.00     | 6.00     | 0.00     | 0.00     | 0.00     | 0.00     |
| 40 |            |          |          | 1644.5        | $B_{3g}$ | 29.11   | 16.64    | 12.48    | 0.00     | 0.00     | 19.52    | 0.00     | 0.00     | 0.00     |
| 41 |            |          |          | 1650.9        | $B_{2g}$ | 149.83  | 85.62    | 64.21    | 0.00     | 0.00     | 0.00     | 0.00     | 100.49   | 0.00     |
| 42 |            |          |          | 1655.7        | $A_g$    | 9.49    | 8.74     | 0.76     | 4.80     | 0.00     | 0.00     | 4.73     | 0.00     | 0.09     |

Table 2: Computed IR and Raman active wavenumbers and intensities for  $\gamma$ -CdC<sub>2</sub>O<sub>4</sub>. Symbols and units as in Table 1.

|     | x        | y        | z        |
|-----|----------|----------|----------|
| Cd  | -0.44654 | -0.18456 | 0.21023  |
| O11 | 0.41763  | 0.11092  | 0.31170  |
| O12 | 0.37387  | 0.24957  | -0.47889 |
| C1  | 0.44044  | 0.10293  | 0.45237  |
| O21 | 0.27717  | -0.05227 | 0.03728  |
| O22 | -0.03859 | -0.20511 | 0.17623  |
| C2  | 0.06800  | -0.07443 | 0.06168  |
| O3  | -0.33837 | -0.49700 | 0.13565  |
| H31 | -0.21532 | 0.41544  | 0.18944  |
| H32 | -0.45508 | 0.41124  | 0.15738  |
| O4  | 0.23067  | -0.35001 | 0.38768  |
| H41 | 0.11582  | -0.32239 | 0.32021  |
| H42 | 0.27251  | 0.49763  | 0.42761  |
| O5  | -0.05935 | 0.24823  | 0.31465  |
| H51 | 0.10609  | 0.21233  | 0.29424  |
| H51 | -0.10874 | 0.27280  | 0.42374  |

Table 3: Calculated (B3LYP) fractional coordinates for  $\text{CdC}_2\text{O}_4 \cdot 3\text{H}_2\text{O}$ .

|    | $\nu_{IR} (Au)$ | $I_{IR}$ | $\nu_{Raman} (Ag)$ | $I_p$   | $I_{pl}$ | $I_{pp}$ | $I_{xx}$ | $I_{xy}$ | $I_{xz}$ | $I_{yy}$ | $I_{yz}$ | $I_{zz}$ |
|----|-----------------|----------|--------------------|---------|----------|----------|----------|----------|----------|----------|----------|----------|
| 1  | 81.5            | 2.17     | 72.0               | 301.08  | 172.10   | 128.97   | 12.19    | 6.20     | 138.25   | 134.30   | 48.45    | 202.77   |
| 2  | 88.9            | 4.11     | 81.3               | 307.34  | 186.78   | 120.55   | 181.59   | 22.66    | 152.42   | 10.39    | 81.41    | 26.43    |
| 3  | 101.4           | 5.18     | 92.3               | 346.40  | 210.52   | 135.88   | 121.90   | 12.68    | 45.06    | 206.71   | 103.66   | 172.95   |
| 4  | 115.8           | 3.97     | 100.5              | 330.34  | 273.64   | 56.70    | 127.73   | 0.31     | 41.93    | 68.74    | 114.97   | 150.64   |
| 5  | 128.3           | 8.91     | 103.8              | 21.53   | 14.92    | 6.61     | 0.41     | 11.67    | 0.02     | 10.63    | 5.40     | 2.88     |
| 6  | 135.2           | 10.05    | 116.3              | 103.47  | 75.58    | 27.89    | 0.14     | 17.30    | 32.70    | 95.13    | 7.03     | 15.20    |
| 7  | 140.8           | 5.68     | 123.2              | 116.33  | 67.05    | 49.29    | 24.93    | 92.91    | 17.71    | 19.06    | 3.68     | 10.49    |
| 8  | 158.8           | 17.43    | 140.5              | 135.15  | 96.51    | 38.63    | 7.23     | 21.54    | 0.07     | 116.58   | 39.90    | 50.18    |
| 9  | 168.2           | 2.45     | 148.7              | 361.28  | 212.25   | 149.03   | 219.92   | 191.83   | 21.11    | 90.57    | 63.37    | 9.13     |
| 10 | 171.4           | 12.22    | 161.3              | 75.04   | 59.29    | 15.75    | 0.08     | 0.42     | 15.92    | 9.98     | 0.32     | 111.81   |
| 11 | 186.8           | 7.01     | 198.9              | 280.91  | 164.01   | 116.90   | 72.48    | 9.08     | 32.11    | 8.58     | 98.01    | 320.51   |
| 12 | 218.7           | 27.71    | 204.7              | 305.93  | 176.76   | 129.17   | 47.89    | 66.46    | 142.31   | 16.29    | 6.47     | 249.04   |
| 13 | 240.3           | 23.10    | 220.2              | 202.62  | 130.48   | 72.14    | 345.96   | 1.13     | 2.37     | 86.93    | 6.94     | 15.88    |
| 14 | 252.5           | 27.56    | 229.9              | 90.55   | 64.43    | 26.12    | 8.56     | 14.91    | 0.18     | 8.65     | 0.31     | 151.42   |
| 15 | 277.2           | 3.16     | 248.2              | 80.98   | 46.87    | 34.11    | 8.15     | 0.25     | 2.87     | 79.47    | 13.29    | 76.28    |
| 16 | 291.8           | 28.64    | 282.3              | 58.32   | 47.97    | 10.35    | 79.23    | 2.71     | 1.66     | 26.96    | 0.87     | 0.74     |
| 17 | 340.1           | 13.59    | 287.3              | 178.44  | 163.61   | 14.82    | 40.52    | 1.76     | 12.42    | 78.24    | 20.21    | 142.78   |
| 18 | 406.4           | 3.15     | 349.3              | 48.79   | 42.40    | 6.39     | 0.03     | 0.95     | 3.39     | 36.55    | 0.26     | 48.52    |
| 19 | 426.4           | 48.91    | 506.8              | 245.16  | 222.33   | 22.83    | 136.02   | 13.21    | 2.31     | 164.71   | 39.54    | 47.22    |
| 20 | 438.5           | 3.74     | 529.7              | 239.82  | 191.38   | 48.43    | 138.01   | 15.24    | 100.70   | 12.14    | 2.63     | 105.41   |
| 21 | 504.5           | 18.22    | 540.9              | 124.49  | 71.64    | 52.86    | 13.76    | 10.84    | 62.52    | 35.00    | 43.05    | 21.56    |
| 22 | 512.7           | 23.46    | 588.5              | 49.20   | 28.55    | 20.65    | 1.47     | 11.94    | 7.00     | 46.71    | 0.02     | 33.31    |
| 23 | 603.3           | 44.69    | 600.3              | 20.48   | 11.73    | 8.75     | 5.28     | 0.10     | 0.70     | 10.21    | 16.38    | 0.11     |
| 24 | 617.4           | 16.48    | 608.4              | 79.29   | 54.49    | 24.80    | 18.77    | 3.51     | 5.10     | 51.13    | 16.05    | 58.70    |
| 25 | 689.8           | 54.92    | 626.5              | 48.25   | 27.89    | 20.35    | 15.60    | 1.38     | 8.13     | 34.26    | 24.19    | 0.00     |
| 26 | 713.4           | 51.70    | 691.7              | 29.75   | 17.83    | 11.92    | 39.56    | 5.69     | 7.15     | 0.96     | 0.17     | 4.68     |
| 27 | 765.9           | 109.39   | 730.1              | 17.24   | 10.97    | 6.27     | 1.48     | 5.82     | 1.84     | 0.00     | 0.01     | 23.38    |
| 28 | 785.5           | 6.55     | 811.8              | 13.76   | 11.36    | 2.40     | 7.42     | 0.00     | 0.01     | 4.90     | 6.47     | 2.35     |
| 29 | 793.2           | 77.11    | 852.7              | 12.96   | 8.65     | 4.31     | 0.12     | 5.29     | 2.40     | 0.03     | 0.13     | 13.69    |
| 30 | 929.7           | 119.21   | 856.7              | 28.80   | 18.32    | 10.48    | 48.60    | 0.80     | 0.27     | 9.84     | 2.87     | 0.79     |
| 31 | 978.3           | 5.53     | 893.2              | 70.72   | 61.14    | 9.57     | 112.33   | 1.46     | 0.12     | 0.67     | 1.15     | 18.76    |
| 32 | 1042.0          | 60.56    | 900.7              | 50.30   | 46.99    | 3.31     | 9.99     | 4.86     | 1.88     | 29.21    | 0.19     | 38.57    |
| 33 | 1333.4          | 171.15   | 980.5              | 108.19  | 87.35    | 20.83    | 88.25    | 1.45     | 19.71    | 45.25    | 21.44    | 1.84     |
| 34 | 1335.4          | 17.52    | 986.9              | 39.54   | 27.75    | 11.79    | 19.46    | 0.02     | 26.90    | 0.08     | 0.22     | 13.93    |
| 35 | 1571.0          | 375.28   | 1047.7             | 16.13   | 10.63    | 5.50     | 18.53    | 2.32     | 0.00     | 4.09     | 2.39     | 4.93     |
| 36 | 1622.1          | 312.18   | 1465.4             | 359.76  | 281.07   | 78.69    | 15.80    | 0.03     | 12.09    | 109.17   | 177.94   | 244.35   |
| 37 | 1628.2          | 104.12   | 1474.0             | 542.51  | 434.75   | 107.76   | 170.90   | 75.62    | 213.91   | 83.34    | 4.10     | 269.98   |
| 38 | 1652.5          | 46.26    | 1604.3             | 29.82   | 18.37    | 11.46    | 4.16     | 7.69     | 7.01     | 7.85     | 9.38     | 10.37    |
| 39 | 1692.4          | 63.28    | 1611.7             | 12.22   | 8.73     | 3.49     | 0.03     | 1.03     | 5.81     | 0.82     | 0.00     | 12.32    |
| 40 | 3191.8          | 622.68   | 1655.2             | 35.77   | 24.10    | 11.67    | 1.78     | 0.04     | 16.13    | 37.68    | 2.99     | 3.28     |
| 41 | 3296.1          | 239.48   | 1661.4             | 38.84   | 22.57    | 16.27    | 35.37    | 0.39     | 9.13     | 14.71    | 3.61     | 17.86    |
| 42 | 3331.1          | 1000.00  | 1698.7             | 20.29   | 11.64    | 8.65     | 7.71     | 0.11     | 5.42     | 0.31     | 10.79    | 8.82     |
| 43 | 3495.0          | 196.29   | 3197.6             | 885.41  | 758.73   | 126.68   | 657.19   | 152.76   | 157.27   | 186.96   | 9.84     | 246.05   |
| 44 | 3636.3          | 256.00   | 3296.9             | 1000.00 | 910.19   | 89.81    | 228.22   | 76.06    | 70.40    | 785.43   | 67.30    | 421.58   |
| 45 | 3719.3          | 81.77    | 3337.1             | 329.03  | 190.86   | 138.17   | 22.14    | 34.44    | 61.20    | 389.68   | 55.39    | 84.69    |
| 46 |                 |          | 3489.9             | 264.89  | 188.58   | 76.32    | 11.66    | 0.01     | 26.77    | 0.29     | 111.91   | 293.88   |
| 47 |                 |          | 3638.1             | 494.91  | 361.80   | 133.12   | 1000.00  | 18.74    | 10.14    | 0.73     | 5.98     | 3.02     |
| 48 |                 |          | 3716.5             | 427.34  | 378.31   | 49.03    | 140.33   | 50.01    | 5.42     | 402.11   | 47.18    | 66.58    |

Table 4: Computed IR and Raman active wavenumbers and intensities for  $\text{CdC}_2\text{O}_4 \cdot 3 \text{H}_2\text{O}$ . Symbols and units as in Table 1. As mentioned in the paper, the values  $>3000 \text{ cm}^{-1}$  are expected to be red-shifted by about  $200 \text{ cm}^{-1}$  due to the highly anharmonic behaviour of the OH oscillator. To realte these data with the figures in the main text, a correction of  $-200 \text{ cm}^{-1}$  should be applied to values  $>3000 \text{ cm}^{-1}$ .
